# Supplementary material for: Mesoamerican Nephropathy and Kidney Disease Progression: A Case Series of Individuals With Kidney Biopsies From Nicaragua and El Salvador
Source: PubMed Central journal article supplement (PMC8515091; doi:10.1016/j.xkme.2021.04.016), 2021-07-05
Supplement: mmc1.pdf [file mmc1.pdf]

**Figure S1:** Interstitial fibrosis at baseline and change in eGFR. The degree of interstitial fibrosis at the time of the biopsy is significantly correlated with a decline in eGFR. One-way ANOVA,  $F(3,20)=6.397$ ,  $p=0.003$ . Graph shows individual values and median. Semi-quantification of interstitial fibrosis in the cortical area defined as: 0= no fibrosis; 1=  $\leq 25\%$  fibrosis; 2= 26-50% fibrosis; 3> 50% fibrosis.

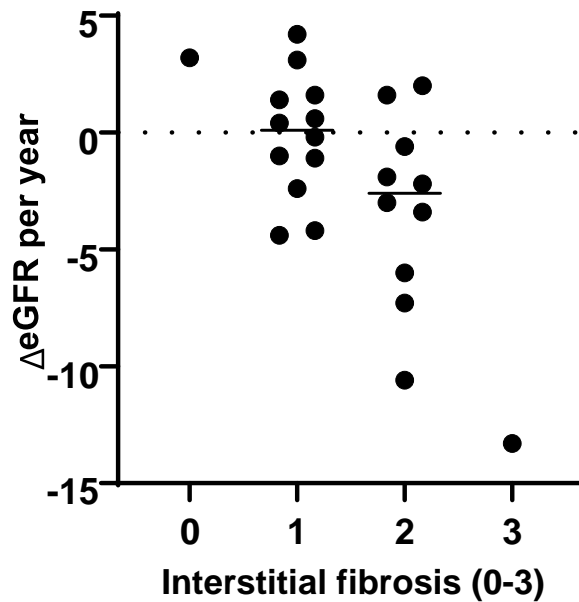

**Figure S2:** Percentage of glomerulosclerosis at baseline and change in eGFR. The percentage of glomerulosclerosis at the time of the biopsy shows a tendency, but non-significant association with a decline in eGFR. Linear regression,  $p=0.09$ .

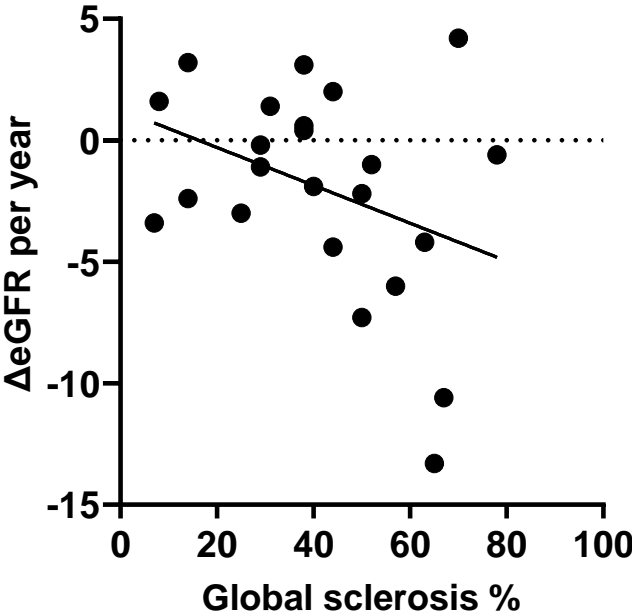

**Table S1:** Individual biochemical follow-up data of two patient case series with Mesoamerican Nephropathy from El Salvador and Nicaragua 4-7 years (F2) after kidney biopsy study.

| Pat no | eGFR<br>T0 | eGFR<br>F2 | Follow-<br>up time<br>T0-F2 | $\Delta$ eGFR<br>per<br>year | S-Na<br>T0 | S-Na<br>F2 | S-K<br>T0        | S-K<br>F2        | S- Mg<br>T0       | S-Mg<br>F2 <sup>a</sup> | ACR<br>T0 | ACR<br>F2       | 24h-<br>U<br>T0 <sup>b</sup> |
|--------|------------|------------|-----------------------------|------------------------------|------------|------------|------------------|------------------|-------------------|-------------------------|-----------|-----------------|------------------------------|
| ES-1   | 62         | 34         | 3.8                         | -7.3                         | 142        | 139        | 3.9              | 3.4 <sup>c</sup> | 1.34 <sup>c</sup> | -                       | 2         | -/ <sup>d</sup> | -                            |
| ES-2   | 30         | 5          | 1.6                         | -13.3                        | 139        | 139        | 5.3              | 3.4 <sup>c</sup> | 1.8               | -                       | 788       | -/ <sup>d</sup> | 7.5                          |
| ES-3   | 40         | 61         | 6.8                         | 3.1                          | 137        | 137        | 4.1              | 3.6              | 2.02              | -                       | 6         | -/ <sup>d</sup> | -                            |
| ES-4   | 43         | 30         | 6.8                         | -1.9                         | 140        | 138        | 3.4 <sup>c</sup> | 2.8 <sup>c</sup> | 1.26 <sup>c</sup> | -                       | 8         | -/ <sup>d</sup> | -                            |
| ES-5   | 78         | 48         | 6.8                         | -4.4                         | 137        | 136        | 2.6 <sup>c</sup> | 2.4 <sup>c</sup> | 0.88 <sup>c</sup> | -                       | 7         | -/ <sup>d</sup> | -                            |
| ES-6   | 28         | 24         | 7.0                         | -0.6                         | 141        | 139        | 4.1              | 3.8              | 1.58              | -                       | 12        | -/ <sup>d</sup> | -                            |
| ES-7   | 75         | 68         | 6.7                         | -1.1                         | 139        | 137        | 3.6              | 3.3 <sup>c</sup> | 1.22 <sup>c</sup> | -                       | 17        | -/ <sup>d</sup> | 2.5                          |
| Nic-1  | 53         | 32         | 5.0                         | -4.2                         | 134        | 136        | 4.4              | 5.7              | 1.46              | 1.82                    | 5         | 18              | 3.2                          |
| Nic-2  | 49         | 57         | 5.0                         | 1.6                          | 138        | 140        | 3.2 <sup>c</sup> | 4.3              | 1.26 <sup>c</sup> | 1.42                    | 1         | 13              | 2.0                          |
| Nic-3  | 50         | 71         | 5.0                         | 4.2                          | 135        | 139        | 3.5              | 4.7              | 1.20 <sup>c</sup> | 1.04 <sup>c</sup>       | 3         | 5               | 1.9                          |

|               |    |    |     |      |     |     |                  |                  |                   |                   |     |    |     |
|---------------|----|----|-----|------|-----|-----|------------------|------------------|-------------------|-------------------|-----|----|-----|
| <b>Nic-4</b>  | 39 | 49 | 5.0 | 2.0  | 138 | 138 | 3.6              | 4.2              | 1.38 <sup>c</sup> | 1.46              | 4   | 31 | 2.5 |
| <b>Nic-5</b>  | 44 | 27 | 5.0 | -3.4 | 137 | 140 | 3.8              | 4.7              | 1.08 <sup>c</sup> | 1.08 <sup>c</sup> | 2   | 35 | 3.5 |
| <b>Nic-6</b>  | 84 | 91 | 5.0 | 1.4  | 136 | 136 | 4.9              | 3.4 <sup>c</sup> | 1.56              | 1.78              | 1   | 10 | 3.0 |
| <b>Nic-7</b>  | 54 | 53 | 5.0 | -0.2 | 135 | 137 | 2.2 <sup>c</sup> | 4.8              | 1.50              | 1.48              | 317 | 18 | 5.3 |
| <b>Nic-8</b>  | 56 | 59 | 5.0 | 0.6  | 136 | 141 | 4.7              | 5.1              | 1.46              | 1.40              | 8   | 30 | 1.6 |
| <b>Nic-9</b>  | 74 | 62 | 5.0 | -2.4 | 137 | 141 | 3.8              | 5.1              | 1.62              | 1.60              | 9   | 13 | 3.7 |
| <b>Nic-10</b> | 81 | 97 | 5.0 | 3.2  | 137 | 139 | 4.5              | 4.7              | 1.58              | 1.80              | 1   | 8  | 1.3 |
| <b>Nic-11</b> | 79 | 72 | 5.0 | -1.4 | 137 | 139 | 3.7              | 4.3              | 1.58              | 1.76              | 2   | 7  | 3.7 |
| <b>Nic-12</b> | 33 | 22 | 5.0 | -2.2 | 136 | 139 | 3.6              | 4.1              | 1.02 <sup>c</sup> | 0.98 <sup>c</sup> | 3   | 9  | 4.8 |
| <b>Nic-13</b> | 61 | 63 | 5.0 | 0.4  | 138 | 138 | 3.6              | 4.7              | 1.60              | 1.30 <sup>c</sup> | 2   | 30 | 3.2 |
| <b>Nic-14</b> | 42 | 44 | 5.0 | 0.4  | 137 | 139 | 3.1 <sup>c</sup> | 4.0              | 1.10 <sup>c</sup> | 1.04 <sup>c</sup> | 1   | 8  | 1.7 |
| <b>Nic-15</b> | 41 | 11 | 5.0 | -6.0 | 133 | 137 | 4.3              | 3.9              | 1.02 <sup>c</sup> | 1.30 <sup>c</sup> | 29  | 14 | 2.1 |
| <b>Nic-16</b> | 43 | 51 | 5.0 | 1.6  | 139 | 139 | 3.7              | 4.4              | 1.64              | 1.66              | 2   | 60 | 2.8 |
| <b>Nic-17</b> | 51 | 46 | 5.0 | -1.0 | 139 | 138 | 4.2              | 4.6              | 1.54              | 1.64              | 7   | 7  | 3.6 |
| <b>Nic-18</b> | 96 | 81 | 5.0 | -3.0 | 136 | 136 | 3.8              | 4.5              | 1.62              | 1.50              | 13  | 6  | 6.7 |

|               |                           |           |                                        |             |            |            |                  |            |             |             |            |           |            |
|---------------|---------------------------|-----------|----------------------------------------|-------------|------------|------------|------------------|------------|-------------|-------------|------------|-----------|------------|
| <b>Nic-19</b> | 60                        | 7         | 5.0                                    | -10.6       | 136        | 139        | 3.3 <sup>c</sup> | 5.0        | 1.50        | 2.46        | 809        | 143       | 2.2        |
| <b>Mean</b>   | <b>56</b>                 | <b>49</b> | <b>5.2</b>                             | <b>-1.7</b> | <b>137</b> | <b>138</b> | <b>3.8</b>       | <b>4.2</b> | <b>1.42</b> | <b>1.50</b> | <b>79</b>  | <b>25</b> | <b>3.3</b> |
| <b>SD</b>     | <b>18</b>                 | <b>23</b> | <b>1.1</b>                             | <b>4.1</b>  | <b>2</b>   | <b>1</b>   | <b>0.7</b>       | <b>0.8</b> | <b>0.27</b> | <b>0.36</b> | <b>220</b> | <b>32</b> | <b>1.6</b> |
| <b>Unit</b>   | ml/min/1.73m <sup>2</sup> | years     | ml/min/<br>1.73m <sup>2</sup><br>/year | mEq/<br>L   | mEq<br>/L  | mEq/<br>L  | mEq/<br>L        | mEq/L      | mEq/L       | mEq/L       | mEq/<br>L  | mg/g      | L          |

Abbreviations: T0, baseline; F2, second follow-up;  $\Delta$  eGFR, change in eGFR; S-Na, serum sodium; S-K, serum potassium; ACR, urine albumin creatinine ratio; 24h-U, 24-hour urine; SD, standard deviation.

Reference values: S-Na, 137-145 mEq/L; S-K, 3.5-5.0 mEq/L; S-Mg, 1.40-1.90 mEq/L; UACR, <30 mg/g.

Conversion factors for units: ACR in mg/g to mg/mmol,  $\times 0.113$ .

<sup>a</sup> S-Mg at follow-up not available in patients from El Salvador.

<sup>b</sup> 24-hour urine collection only available in two patients from El Salvador.

<sup>c</sup> Below reference value.

<sup>d</sup> Incomplete data.

**Table S2:** Baseline eGFR, progression rate, and kidney biopsy findings at baseline in two patient case series with Mesoamerican Nephropathy from El Salvador and Nicaragua.

| Pat no | eGFR<br>T0 | $\Delta$ eGFR<br>per year | Global<br>scleros<br>(%) <sup>a</sup> | Segm<br>scleros<br>(0-1) <sup>b</sup> | Interst<br>fibrosis<br>(0-3) <sup>c</sup> | Interst<br>inflam<br>(0-3) <sup>c</sup> | Tubular<br>atrophy<br>(0-3) <sup>c</sup> | Glom<br>size<br>(0-3) <sup>d</sup> | Wrinkl<br>GBM/<br>Periglom<br>fibrosis<br>(0-1) <sup>e</sup> |
|--------|------------|---------------------------|---------------------------------------|---------------------------------------|-------------------------------------------|-----------------------------------------|------------------------------------------|------------------------------------|--------------------------------------------------------------|
| ES-1   | 62         | -7.3                      | 50%                                   | 0                                     | 2                                         | 1                                       | 1                                        | 2                                  | 1                                                            |
| ES-2   | 30         | -13.3                     | 65%                                   | 1                                     | 3                                         | 2                                       | 2                                        | 3                                  | 1                                                            |
| ES-3   | 40         | 3.1                       | 38%                                   | 0                                     | 1                                         | 1                                       | 1                                        | 1                                  | 1                                                            |
| ES-4   | 43         | -1.9                      | 40%                                   | 0                                     | 2                                         | 2                                       | 2                                        | 2                                  | 1                                                            |
| ES-5   | 78         | -4.4                      | 44%                                   | 0                                     | 1                                         | 1                                       | 1                                        | 1                                  | 1                                                            |
| ES-6   | 28         | -0.6                      | 78%                                   | 1                                     | 2                                         | 1                                       | 2                                        | 3                                  | 1                                                            |
| ES-7   | 75         | -1.1                      | 29%                                   | 0                                     | 1                                         | 0                                       | 1                                        | 1                                  | 1                                                            |
| Nic-1  | 53         | -4.2                      | 63%                                   | 0                                     | 1                                         | 1                                       | 1                                        | 3                                  | 1                                                            |
| Nic-2  | 49         | 1.6                       | n/a <sup>f</sup>                      | 0                                     | 1                                         | 1                                       | 0                                        | 1                                  | 0                                                            |

|               |    |      |                  |   |   |   |   |   |   |
|---------------|----|------|------------------|---|---|---|---|---|---|
| <b>Nic-3</b>  | 50 | 4.2  | 70%              | 0 | 1 | 1 | 1 | 2 | 1 |
| <b>Nic-4</b>  | 39 | 2.0  | 44%              | 0 | 2 | 2 | 2 | 2 | 1 |
| <b>Nic-5</b>  | 44 | -3.4 | 7%               | 0 | 2 | 1 | 1 | 3 | 1 |
| <b>Nic-6</b>  | 84 | 1.4  | 31%              | 0 | 1 | 1 | 1 | 2 | 1 |
| <b>Nic-7</b>  | 54 | -0.2 | 29%              | 1 | 1 | 1 | 1 | 3 | 1 |
| <b>Nic-8</b>  | 56 | 0.6  | 38%              | 0 | 1 | 1 | 1 | 3 | 1 |
| <b>Nic-9</b>  | 74 | -2.4 | 14%              | 0 | 1 | 1 | 1 | 2 | 1 |
| <b>Nic-10</b> | 81 | 3.2  | 14%              | 0 | 0 | 0 | 0 | 2 | 0 |
| <b>Nic-11</b> | 79 | -1.4 | n/a <sup>f</sup> | - | - | - | - | - | - |
| <b>Nic-12</b> | 33 | -2.2 | 50%              | 0 | 2 | 2 | 1 | 2 | 1 |
| <b>Nic-13</b> | 61 | 0.4  | 38%              | 0 | 1 | 0 | 1 | 2 | 1 |
| <b>Nic-14</b> | 42 | 0.4  | n/a <sup>f</sup> | - | - | - | - | - | - |
| <b>Nic-15</b> | 41 | -6.0 | 57%              | 1 | 2 | 1 | 2 | 2 | 1 |
| <b>Nic-16</b> | 43 | 1.6  | 8%               | 0 | 2 | 1 | 1 | 2 | 1 |
| <b>Nic-17</b> | 51 | -1.0 | 52%              | 0 | 1 | 1 | 1 | 2 | 1 |

|               |    |                                 |     |   |   |   |   |   |   |
|---------------|----|---------------------------------|-----|---|---|---|---|---|---|
| <b>Nic-18</b> | 96 | -3.0                            | 25% | 0 | 2 | 1 | 1 | 2 | 1 |
| <b>Nic-19</b> | 60 | -10.6                           | 67% | 0 | 2 | 1 | 1 | 3 | 1 |
| <b>Unit</b>   |    | ml/min/1.73m <sup>2</sup> /year |     |   |   |   |   |   |   |

eGFR T0 and kidney biopsy findings compiled from baseline studies (Wijkström et al, *Am J Kidney Dis* 2013 and Wijkström et al, *Am J Kidney Dis* 2017).

Abbreviations: T0, baseline;  $\Delta$  eGFR, change in eGFR; Global sclerosis, globally sclerosed glomeruli; Segm Sclerosis, segmental sclerosed glomeruli; Interst fibrosis, interstitial fibrosis; Interst inflam, interstitial inflammation; Glom size, glomerular size; Wrinkl GBM, wrinkled glomerular basement membrane; Periglom fibrosis, periglomerular fibrosis.

<sup>a</sup> Percentage of globally sclerosed glomeruli in the biopsy

<sup>b</sup> 0=No segmentally sclerosed glomeruli; 1=presence of segmentally sclerosed glomeruli in the biopsy.

<sup>c</sup> Grading of interstitial fibrosis, interstitial inflammation, and tubular atrophy is defined as 0=no; 1=mild, affecting 25% of the area; 2=moderate, affecting 26-50%; and 3=severe, affecting > 50%.

<sup>d</sup> Grading 0=normal, 1=mild hypertrophy; 2=moderate; and 3=severe hypertrophy.

<sup>e</sup> 0=No; 1=Yes.

<sup>f</sup> Not applicable, not enough tissue for evaluation (less than 5 glomeruli in biopsy).



**Table S3:** Self-reported data of medication and work exposure during follow-up in the 19 patients with Mesoamerican Nephropathy from Nicaragua.

| <b>Pat no</b> | <b>eGFR T0</b> | <b>ΔeGFR per year</b> | <b>ACEi/ ARBs</b> | <b>Allo-purinol</b> | <b>Physical demanding work last 3 months</b> | <b>Agricultural work tasks last 5 years<sup>a</sup></b> | <b>Exposure to agrochemicals last 3 years?<sup>b</sup></b> |
|---------------|----------------|-----------------------|-------------------|---------------------|----------------------------------------------|---------------------------------------------------------|------------------------------------------------------------|
| <b>Nic-1</b>  | 53             | -4.2                  | No                | Yes                 | Yes                                          | Yes                                                     | Yes                                                        |
| <b>Nic-2</b>  | 49             | 1.6                   | Yes               | Yes                 | Yes                                          | Yes                                                     | No                                                         |
| <b>Nic-3</b>  | 50             | 4.2                   | Yes               | Yes                 | Yes                                          | Yes                                                     | Yes                                                        |
| <b>Nic-4</b>  | 39             | 2.0                   | No                | No                  | No                                           | No                                                      | No                                                         |
| <b>Nic-5</b>  | 44             | -3.4                  | No                | No                  | No                                           | No                                                      | No                                                         |
| <b>Nic-6</b>  | 84             | 1.4                   | No                | No                  | No                                           | Yes                                                     | No                                                         |
| <b>Nic-7</b>  | 54             | -0.2                  | No                | No                  | No                                           | Yes                                                     | Yes                                                        |
| <b>Nic-8</b>  | 56             | 0.6                   | No                | Yes                 | No                                           | Yes                                                     | No                                                         |
| <b>Nic-9</b>  | 74             | -2.4                  | No                | Yes                 | No                                           | Yes                                                     | Yes                                                        |
| <b>Nic-10</b> | 81             | 3.2                   | Yes               | Yes                 | No                                           | No                                                      | No                                                         |

|               |    |       |     |     |     |     |     |
|---------------|----|-------|-----|-----|-----|-----|-----|
| <b>Nic-11</b> | 79 | -1.4  | Yes | Yes | Yes | No  | Yes |
| <b>Nic-12</b> | 33 | -2.2  | Yes | Yes | No  | No  | No  |
| <b>Nic-13</b> | 61 | 0.4   | Yes | Yes | No  | No  | No  |
| <b>Nic-14</b> | 42 | 0.4   | Yes | No  | No  | No  | No  |
| <b>Nic-15</b> | 41 | -6.0  | Yes | Yes | No  | Yes | No  |
| <b>Nic-16</b> | 43 | 1.6   | No  | Yes | Yes | Yes | Yes |
| <b>Nic-17</b> | 51 | -1.0  | No  | Yes | No  | Yes | No  |
| <b>Nic-18</b> | 96 | -3.0  | Yes | Yes | Yes | Yes | Yes |
| <b>Nic-19</b> | 60 | -10.6 | Yes | No  | Yes | No  | No  |

Abbreviations:  $\Delta$  eGFR, change in eGFR; ACEi/ARBs, Angiotensin converting enzyme inhibitors/ Angiotensin II receptor blockers.

<sup>a</sup> Among patients with agricultural work tasks during follow-up, the median duration was 3.0 years (range 0.3-5 years). Only 1 patient worked with sugarcane. Subsistence farming was the most common work task, reported from 6 patients.

<sup>b</sup> Agrochemicals reported were: 2,4D (2,4-Dichlorophenoxyacetic acid) in two patients; Atrazine in two patients; Chlorothalonil in one patient; Chlorpyrifos in one patient; Cypermethrin in four patients; Diphacinone in one patient; Glyphosate in four patients; Paraquat in one patient.
